# Supplementary material for: The Synthetic Opioid Fentanyl Increases HIV Replication and Chemokine Co-Receptor Expression in Lymphocyte Cell Lines
Source: MDPI journal article supplement (doi:10.3390/v15041027), 2023-04-21
Supplement: s1 [file s1]

**Table S1.** List of miRNAs with their *p*-value and fold change.

| Gene ID      | Symbol                                    | Name                                      | Base Mean | Base Mean Con1 | Base Mean Fent1 | Fold Change | log2Fold Change | pval | padj | ACH-2 Control Repl-icate-1 | ACH-2 Control Repl-icate-2 | ACH-2 with Fenta-nyl Repl-icate-1 | ACH-2 with Fenta-nyl Repl-icate-2 |
|--------------|-------------------------------------------|-------------------------------------------|-----------|----------------|-----------------|-------------|-----------------|------|------|----------------------------|----------------------------|-----------------------------------|-----------------------------------|
| MIMAT0023712 | hsa-miR-6087;                             | hsa-miR-6087;                             | 36        | 7.7            | 64.6            | 7.3         | 2.9             | 0.0  | 1.0  | 5193.9                     | 6822.4                     | 28043.5                           | 58470.4                           |
| MIMAT0030019 | hsa-miR-7704;                             | hsa-miR-7704;                             | 82        | 20.7           | 142.9           | 5.8         | 2.5             | 0.0  | 1.0  | 25969.4                    | 6001.7                     | 41948.7                           | 137893.2                          |
| MIMAT0019058 | hsa-miR-4521;                             | hsa-miR-4521;                             | 14        | 25.3           | 2.9             | 0.1         | -3.2            | 0.0  | 1.0  | 18178.6                    | 14752.4                    | 1207.6                            | 2035.7                            |
| MIMAT0000102 | hsa-miR-105;hsa-miR-105-5p;               | hsa-miR-105;hsa-miR-105-5p;               | 3         | 5.6            | 0.0             | 0.0         | -6.0            | 0.0  | 1.0  | 2709.9                     | 4195.2                     | 0.0                               | 0.0                               |
| MIMAT0000104 | hsa-miR-107;                              | hsa-miR-107;                              | 3         | 6.6            | 0.0             | 0.0         | -6.3            | 0.0  | 1.0  | 6548.8                     | 1906.9                     | 0.0                               | 0.0                               |
| MIMAT0004570 | hsa-miR-223*;hsa-miR-223-5p;              | hsa-miR-223*;hsa-miR-223-5p;              | 21        | 5.8            | 37.1            | 5.6         | 2.5             | 0.0  | 1.0  | 5193.9                     | 2392.3                     | 24152.3                           | 17303.6                           |
| MIMAT0000078 | hsa-miR-23a;hsa-miR-23a-3p;               | hsa-miR-23a;hsa-miR-23a-3p;               | 2         | 4.7            | 0.0             | 0.0         | -5.7            | 0.0  | 1.0  | 2967.9                     | 3341.6                     | 0.0                               | 0.0                               |
| MIMAT0007402 | hsa-miR-103-as;hsa-miR-103b;              | hsa-miR-103-as;hsa-miR-103b;              | 129       | 194.8          | 63.4            | 0.3         | -1.8            | 0.1  | 1.0  | 130976.3                   | 110981.1                   | 42739.0                           | 25313.7                           |
| MIMAT0000101 | hsa-miR-103;hsa-miR-103a;hsa-miR-103a-3p; | hsa-miR-103;hsa-miR-103a;hsa-miR-103a-3p; | 129       | 194.8          | 63.4            | 0.3         | -1.8            | 0.1  | 1.0  | 130976.3                   | 110981.1                   | 42739.0                           | 25313.7                           |
| MIMAT0019045 | hsa-miR-4508;                             | hsa-miR-4508;                             | 41        | 8.2            | 74.5            | 7.4         | 2.9             | 0.1  | 1.0  | 12220.9                    | 2063.9                     | 1562.8                            | 101426.7                          |
| MIMAT0004766 | hsa-miR-146b-3p;                          | hsa-miR-146b-3p;                          | 1         | 2.8            | 0.0             | 0.0         | -5.0            | 0.1  | 1.0  | 1652.6                     | 1993.6                     | 0.0                               | 0.0                               |
| MIMAT0003882 | hsa-miR-767-5p;                           | hsa-miR-767-5p;                           | 1         | 2.5            | 0.0             | 0.0         | -4.8            | 0.1  | 1.0  | 1129.1                     | 1906.9                     | 0.0                               | 0.0                               |
| MIMAT0000075 | hsa-miR-20;hsa-miR-20a;hsa-miR-20a-5p;    | hsa-miR-20;hsa-miR-20a;hsa-miR-20a-5p;    | 68        | 101.5          | 34.5            | 0.3         | -1.7            | 0.1  | 1.0  | 79940.7                    | 47290.9                    | 15016.4                           | 21419.3                           |
| MIMAT0019022 | hsa-miR-4488;                             | hsa-miR-4488;                             | 24        | 6.0            | 41.4            | 5.6         | 2.5             | 0.1  | 1.0  | 8367.9                     | 1461.9                     | 5903.9                            | 48518.0                           |
| MIMAT0000732 | hsa-miR-422b;hsa-miR-378;hsa-miR-378a-3p; | hsa-miR-422b;hsa-miR-378;hsa-miR-378a-3p; | 191       | 279.8          | 102.1           | 0.3         | -1.6            | 0.1  | 1.0  | 220504.1                   | 145131.7                   | 53135.0                           | 60053.7                           |
| MIMAT0022736 | hsa-miR-642b-5p;                          | hsa-miR-642b-5p;                          | 1         | 2.2            | 0.0             | 0.0         | -4.6            | 0.1  | 1.0  | 1180.4                     | 1594.9                     | 0.0                               | 0.0                               |
| MIMAT0020924 | hsa-miR-642a-3p;                          | hsa-miR-642a-3p;                          | 1         | 2.2            | 0.0             | 0.0         | -4.6            | 0.1  | 1.0  | 1180.4                     | 1594.9                     | 0.0                               | 0.0                               |
| MIMAT0000070 | hsa-miR-17-5p;hsa-miR-17;hsa-miR-17-5p;   | hsa-miR-17-5p;hsa-miR-17;hsa-miR-17-5p;   | 45        | 67.5           | 22.7            | 0.3         | -1.7            | 0.1  | 1.0  | 43583.5                    | 40044.7                    | 10396.0                           | 13630.5                           |

|              |                                        |                                        |     |      |       |     |      |     |     |         |         |         |          |
|--------------|----------------------------------------|----------------------------------------|-----|------|-------|-----|------|-----|-----|---------|---------|---------|----------|
| MIMAT0000417 | hsa-miR-15b;hsa-miR-15b-5p;            | hsa-miR-15b;hsa-miR-15b-5p;            | 2   | 3.5  | 0.0   | 0.0 | -5.3 | 0.1 | 1.0 | 2596.9  | 1993.6  | 0.0     | 0.0      |
| MIMAT0004694 | hsa-miR-342-5p;                        | hsa-miR-342-5p;                        | 150 | 70.7 | 230.3 | 2.8 | 1.5  | 0.1 | 1.0 | 57380.1 | 39263.8 | 87293.2 | 177010.6 |
| MIMAT0003311 | hsa-miR-641;                           | hsa-miR-641;                           | 1   | 2.3  | 0.0   | 0.0 | -4.7 | 0.1 | 1.0 | 865.6   | 1827.4  | 0.0     | 0.0      |
| MIMAT0003322 | hsa-miR-652;hsa-miR-652-3p;            | hsa-miR-652;hsa-miR-652-3p;            | 4   | 7.7  | 1.0   | 0.1 | -3.0 | 0.1 | 1.0 | 5935.9  | 4594.7  | 1265.1  | 0.0      |
| MIMAT0022735 | hsa-miR-374c-3p;                       | hsa-miR-374c-3p;                       | 1   | 2.1  | 0.0   | 0.0 | -4.5 | 0.1 | 1.0 | 708.3   | 1993.6  | 0.0     | 0.0      |
| MIMAT0000703 | hsa-miR-361;hsa-miR-361-5p;            | hsa-miR-361;hsa-miR-361-5p;            | 4   | 6.6  | 1.0   | 0.1 | -2.8 | 0.1 | 1.0 | 5430.0  | 3189.7  | 1207.6  | 0.0      |
| MIMAT0004955 | hsa-miR-374b;hsa-miR-374b-5p;          | hsa-miR-374b;hsa-miR-374b-5p;          | 1   | 2.1  | 0.0   | 0.0 | -4.5 | 0.1 | 1.0 | 708.3   | 1993.6  | 0.0     | 0.0      |
| MIMAT0019053 | hsa-miR-4516;                          | hsa-miR-4516;                          | 5   | 1.6  | 8.8   | 4.2 | 2.1  | 0.1 | 1.0 | 2749.7  | 0.0     | 3125.6  | 9220.6   |
| MIMAT0005919 | hsa-miR-548o;hsa-miR-548o-3p;          | hsa-miR-548o;hsa-miR-548o-3p;          | 3   | 1.2  | 4.9   | 3.2 | 1.7  | 0.2 | 1.0 | 1180.4  | 398.7   | 2415.2  | 3053.6   |
| MIMAT0017985 | hsa-miR-3607-3p;                       | hsa-miR-3607-3p;                       | 9   | 3.3  | 13.8  | 3.6 | 1.9  | 0.2 | 1.0 | 2077.6  | 2631.5  | 6641.9  | 10076.8  |
| MIMAT0004588 | hsa-miR-27b*;hsa-miR-27b-5p;           | hsa-miR-27b*;hsa-miR-27b-5p;           | 1   | 1.5  | 0.0   | 0.1 | -4.2 | 0.2 | 1.0 | 1180.4  | 797.4   | 0.0     | 0.0      |
| MIMAT0000072 | hsa-miR-18;hsa-miR-18a;hsa-miR-18a-5p; | hsa-miR-18;hsa-miR-18a;hsa-miR-18a-5p; | 1   | 1.7  | 0.0   | 0.0 | -4.4 | 0.2 | 1.0 | 1354.9  | 762.8   | 0.0     | 0.0      |
| MIMAT0019074 | hsa-miR-378i;                          | hsa-miR-378i;                          | 1   | 1.7  | 0.0   | 0.0 | -4.4 | 0.2 | 1.0 | 1484.0  | 835.4   | 0.0     | 0.0      |
| MIMAT0004693 | hsa-miR-330-5p;                        | hsa-miR-330-5p;                        | 3   | 5.4  | 1.0   | 0.2 | -2.5 | 0.2 | 1.0 | 4249.5  | 2791.0  | 1207.6  | 0.0      |

**Table S2.** List of microRNAs that may play a role in HIV pathogenesis. MicroRNAs that are differentially expressed with p-value < 0.2 are denoted by ●.

| microRNA       | Effect   | References                                 | ACH-2 in the prescence of Fentanyl |
|----------------|----------|--------------------------------------------|------------------------------------|
| 15             |          | Su 2018 [100]                              | ●                                  |
| 16             |          | Su 2018 [100]                              |                                    |
| 17             | Negative | Triboulet R 2007 [101]                     | ●                                  |
| 20             |          | Su 2018 [100]                              |                                    |
| 28             |          | Su 2018 [100]                              |                                    |
| 31             |          | Sung and Rice 2009 [102]                   |                                    |
| 101            |          | Su 2018 [100]                              |                                    |
| 132            | Positive | Chiang 2013 [103]                          |                                    |
| 144            |          | Su 2018 [100]                              |                                    |
| 149            | Negative | Hariharan 2005 [104]                       |                                    |
| 150            |          | Su 2018 [100]                              |                                    |
| 155            |          | Su 2018; Pilakka-Kanthikeel 2015 [100,105] |                                    |
| 155            | Positive | Jin C 2017 [106]                           |                                    |
| 193            |          | Su 2018 [100]                              |                                    |
| 198            |          | Su 2018 [100]                              |                                    |
| 198            | Negative | Sung and Rice 2009 [102]                   |                                    |
| 200            |          | Sung and Rice 2009 [102]                   |                                    |
| 217            |          | Kwon and Ott 2008 [107]                    |                                    |
| 221            |          | Egana-Gorrone 2014 [108]                   |                                    |
| 326            | Negative | Houzet 2012 [109]                          |                                    |
| 349            |          | Duskova 2013[128]                          |                                    |
| 378            |          | Su 2018 [100]                              | ●                                  |
| 378            | Negative | Hariharan 2005 [104]                       |                                    |
| 382            |          | Su 2018 [100]                              |                                    |
| 503            |          | Sung and Rice 2009 [102]                   |                                    |
| 526            |          | Sung and Rice 2009 [102]                   |                                    |
| 888            | Negative | Chen 2014 [110]                            |                                    |
| 1290           | Negative | Wang 2015 [111]                            |                                    |
| 4508           |          | Egaña-Gorroño L 2016 [113]                 |                                    |
| 4516           |          | Asahchop 2016 [114]                        | ●                                  |
| 106b           |          | Su 2018 [100]                              |                                    |
| 125b           |          | Su 2018; Mantri 2012[100]                  |                                    |
| 125b-5p        | Negative | Huang 2007 [112]                           |                                    |
| 133b           | Negative | Houzet 2012 [109]                          |                                    |
| 138-5p         | Negative | Houzet 2012 [109]                          |                                    |
| 146a           | Negative | Chen 2014 [110]                            |                                    |
| 146b           |          | Su 2018 [100]                              | ●                                  |
| 149-5p         | Negative | Houzet 2012 [109]                          |                                    |
| 150-5p         | Negative | Huang 2007; Wang 2015 [112, 111]           |                                    |
| 155-5p         | Negative | Dey 2016 [115]                             |                                    |
| 181a           | Positive | Pilakka-Kanthikeel 2015 [116]              |                                    |
| 191-5p         | Negative | Zheng Y 2021 [117]                         |                                    |
| 196b           | Negative | Wang 2015 [111]                            |                                    |
| 19b            |          | Su 2018 [100]                              |                                    |
| 223-3p         | Negative | Huang 2007; Wang 2015 [112, 111]           | ●                                  |
| 27a            |          | Egana-Gorrone 2014 [108]                   |                                    |
| 27b            |          | Egana-Gorrone 2014 [108]                   | ●                                  |
| 28-5p          | Negative | Huang 2007; Wang 2015 [112, 111]           |                                    |
| 29a            | Negative | Su 2018 [100]                              |                                    |
| 29a-3p         | Negative | Nathans 2009 [118]                         |                                    |
| 29b            |          | Su 2018 [100]                              |                                    |
| 29b-3p         | Negative | Sun 2012 [119]                             |                                    |
| 3146a-5p       |          | Reynoso 2014 [120]                         |                                    |
| 3162_3p        |          | Huang 2018 [121]                           |                                    |
| 324-5p         |          | Su 2018 [100]                              |                                    |
| 33a-5p         |          | Su 2018 [100]                              |                                    |
| 341-3p         |          | Su 2018 [100]                              |                                    |
| 342-3p         |          | Su 2018 [100]                              |                                    |
| 34a            |          | Kwon and Ott 2008 [107]                    |                                    |
| 34c-5p         | Positive | Su 2018 [100]                              |                                    |
| 3607-3p        |          | Chang ST 2013 [122]                        | ●                                  |
| 382-5p         | Negative | Huang 2007; Wang 2015 [112, 111]           |                                    |
| 423-3p         | Negative | Whisnant 2013 [123]                        |                                    |
| 615-3p         |          | Su 2018 [100]                              |                                    |
| 92a-3p         | Negative | Houzet 2012 [109]                          |                                    |
| 99a            |          | Sung and Rice 2009 [102]                   |                                    |
| H1-HIV-encoded |          | Kaul 2009 [124]                            |                                    |
| H3-HIV-encoded |          | Zhang 2014 [125]                           |                                    |

|                                                   |                  |
|---------------------------------------------------|------------------|
| let-7e                                            | Su 2018 [100]    |
| N367-HIV-encoded                                  | Omoto 2004 [126] |
| TAR-3p-HIV-encoded                                | Harwig A [127]   |
| <b>Total number correlated</b>                    | <b>8</b>         |
| <b>Total number of significant genes detected</b> | <b>32</b>        |

**Table S3.** List of differentially regulated genes in fentanyl treated ACH-2 cells. The list of genes that are significantly regulated are labeled in green ( $p$ -value < 0.05 by moderated t-test; -), with 21 more indicating a trend toward significance are labelled in red ( $p$ -value < 0.1).

| S.No             | Gene     | p ([Ctrl] vs [Fent]) | Regulation | Fold change |
|------------------|----------|----------------------|------------|-------------|
| <b>Antiviral</b> |          |                      |            |             |
| 1                | ADAR     | 0.88652              | down       | -1.0406     |
| 2                | APCS     | 1                    | down       | -1          |
| 3                | APOBEC3A | 0.37358              | up         | 14.4346     |
| 4                | APOBEC3B | 1.08E-05             | down       | -347.85     |
| 5                | APOBEC3C | 0.18229              | up         | 2.21937     |
| 6                | APOBEC3D | 9.60E-04             | down       | -122.69     |
| 7                | APOBEC3F | 0.37358              | up         | 17.6086     |
| 8                | APOBEC3G | 0.63923              | up         | 1.22118     |
| 9                | APOBEC3H | 1                    | down       | -1          |
| 10               | BST2     | 0.63858              | down       | -1.5433     |
| 11               | BTBD17   | 1                    | down       | -1          |
| 12               | C19orf66 | 0.79871              | down       | -1.0916     |
| 13               | CCNK     | 0.988                | down       | -1.0087     |
| 14               | CEACAM1  | 1                    | down       | -1          |
| 15               | CHMP3    | 0.79257              | up         | 1.14245     |
| 16               | EIF2AK2  | 0.21957              | up         | 2.11167     |
| 17               | EIF2AK4  | 0.82777              | up         | 1.09961     |
| 18               | FAM111A  | 0.25928              | up         | 1.23637     |
| 19               | FBLN1    | 1                    | down       | -1          |
| 20               | FCN1     | 1                    | down       | -1          |
| 21               | FCN3     | 1                    | down       | -1          |
| 22               | GSN      | 0.01065              | up         | 6.05886     |
| 23               | HDAC1    | 0.44975              | up         | 1.20977     |
| 24               | HMGA2    | 1                    | down       | -1          |
| 25               | IFI16    | 0.09172              | up         | 1.96306     |
| 26               | IFIT1    | 0.93228              | down       | -1.3167     |
| 27               | IFITM1   | 0.52872              | up         | 1.25463     |
| 28               | IFITM2   | 0.68051              | down       | -1.3616     |
| 29               | IFITM3   | 1                    | down       | -1          |
| 30               | IFNA2    | 1                    | down       | -1          |
| 31               | IFNB1    | 1                    | down       | -1          |
| 32               | IFNL3    | 1                    | down       | -1          |
| 33               | ILF3     | 0.43483              | down       | -1.3283     |
| 34               | INPP5K   | 3.43E-05             | up         | 397.538     |
| 35               | ISG15    | 0.73606              | up         | 1.15973     |
| 36               | ISG20    | 1                    | down       | -1          |
| 37               | JUN      | 0.08212              | up         | 3.03436     |
| 38               | LTF      | 1                    | down       | -1          |
| 39               | MAVS     | 0.142                | up         | 1.35803     |
| 40               | MBL2     | 1                    | down       | -1          |
| 41               | MID2     | 0.37358              | up         | 6.34281     |
| 42               | MX1      | 0.37358              | down       | -11.278     |
| 43               | NBN      | 0.505                | up         | 1.2004      |
| 44               | OAS1     | 0.37358              | up         | 26.9376     |
| 45               | OAS3     | 0.92876              | up         | 1.04212     |
| 46               | OASL     | 1                    | down       | -1          |
| 47               | PARP10   | 0.06804              | up         | 2.87145     |
| 48               | PLSCR1   | 0.27056              | up         | 34.6392     |
| 49               | PML      | 0.5475               | down       | -1.0418     |
| 50               | POU2F3   | 1                    | down       | -1          |
| 51               | PROX1    | 1                    | down       | -1          |
| 52               | PTX3     | 1                    | down       | -1          |
| 53               | RAD50    | 0.91593              | up         | 1.04654     |
| 54               | REST     | 0.05405              | up         | 3.15287     |
| 55               | RNASEL   | 0.48237              | down       | -1.2191     |
| 56               | RSAD2    | 0.37358              | down       | -8.8418     |

|            |           |          |      |         |
|------------|-----------|----------|------|---------|
| 57         | SLPI      | 1        | down | -1      |
| 58         | SNX3      | 0.33192  | up   | 1.33217 |
| 59         | SP100     | 0.44692  | up   | 1.55679 |
| 60         | SRPK1     | 0.25565  | down | -1.3319 |
| 61         | SRPK2     | 0.62493  | up   | 1.19935 |
| 62         | STAT1     | 0.38021  | up   | 1.44865 |
| 63         | TARDBP    | 0.00111  | down | -1.3148 |
| 64         | TFAP4     | 7.93E-04 | up   | 189.609 |
| 65         | TNF       | 1.10E-05 | up   | 170.291 |
| 66         | TNIP1     | 0.27302  | down | -1.4924 |
| 67         | TRIM10    | 1        | down | -1      |
| 68         | TRIM11    | 0.89114  | up   | 1.10269 |
| 69         | TRIM13    | 0.04278  | down | -1.9933 |
| 70         | TRIM14    | 0.77569  | down | -1.1578 |
| 71         | TRIM15    | 1        | down | -1      |
| 72         | TRIM21    | 0.47329  | up   | 10.3722 |
| 73         | TRIM25    | 0.41929  | down | -1.3766 |
| 74         | TRIM26    | 0.03591  | up   | 2.19234 |
| 75         | TRIM27    | 0.32817  | down | -1.9548 |
| 76         | TRIM28    | 0.0063   | down | -1.6028 |
| 77         | TRIM31    | 1        | down | -1      |
| 78         | TRIM32    | 0.83858  | up   | 2.07532 |
| 79         | TRIM35    | 0.12271  | up   | 1.58826 |
| 80         | TRIM5     | 0.31635  | up   | 24.9882 |
| 81         | TRIM56    | 0.53266  | up   | 1.89347 |
| 82         | TRIM59    | 0.2733   | up   | 1.61728 |
| 83         | TRIM6     | 4.50E-08 | down | -94.432 |
| 84         | TRIM62    | 0.36432  | up   | 8.59365 |
| 85         | TRIM8     | 0.02798  | up   | 1.6032  |
| 86         | VAPA      | 0.47273  | down | -1.2236 |
| 87         | VAPB      | 0.4507   | down | -1.2851 |
| 88         | ZC3H12A   | 0.98093  | up   | 1.08089 |
| 89         | ZC3HAV1   | 0.70343  | up   | 1.12694 |
| 90         | ZNF639    | 0.73133  | up   | 1.15464 |
| Cell death |           |          |      |         |
| 91         | BMX       | 1        | down | -1      |
| 92         | BBC3      | 1        | down | -1      |
| 93         | DAPK3     | 0.96369  | down | -1.2019 |
| 94         | DSG3      | 1        | down | -1      |
| 95         | DSG1      | 1        | down | -1      |
| 96         | MAPT      | 1        | down | -1      |
| 97         | BAX       | 0.94988  | down | -1.3581 |
| 98         | DSP       | 1        | down | -1      |
| 99         | HIST1H1A  | 1        | down | -1      |
| 100        | PSMB10    | 0.38151  | down | -22.99  |
| 101        | DAPK2     | 1        | down | -1      |
| 102        | CD14      | 1        | down | -1      |
| 103        | TICAM2    | 1        | down | -1      |
| 104        | UNC5A     | 1        | down | -1      |
| 105        | DCC       | 1        | down | -1      |
| 106        | BMF       | 1        | down | -1      |
| 107        | SFN       | 1        | down | -1      |
| 108        | PKP1      | 0.37358  | down | -6.5257 |
| 109        | BAD       | 0.90015  | up   | 1.76439 |
| 110        | TP73      | 1        | down | -1      |
| 111        | CASP9     | 1.93E-07 | down | -136.63 |
| 112        | HIST1H1E  | 0.37358  | down | -20.122 |
| 113        | DFFB      | 0.37358  | down | -9.3878 |
| 114        | PRKCD     | 0.37358  | down | -10.09  |
| 115        | HIST1H1D  | 1        | down | -1      |
| 116        | CDH1      | 1        | down | -1      |
| 117        | TNFRSF10A | 0.37358  | down | -12.091 |
| 118        | UNC5B     | 1        | down | -1      |
| 119        | LY96      | 0.37358  | down | -30.155 |
| 120        | PTK2      | 1        | down | -1      |
| 121        | FASLG     | 1        | down | -1      |
| 122        | TLR4      | 1        | down | -1      |
| 123        | GAS2      | 1        | down | -1      |
| 124        | TP63      | 1        | down | -1      |
| 125        | GZMB      | 1        | down | -1      |
| 126        | PSMD9     | 0.4026   | down | -16.658 |

|     |           |          |      |         |
|-----|-----------|----------|------|---------|
| 127 | HIST1H1B  | 4.71E-07 | down | -399.14 |
| 128 | PSMB11    | 1        | down | -1      |
| 129 | TJP1      | 1        | down | -1      |
| 130 | TRADD     | 0.99207  | up   | 1.03748 |
| 131 | PPP1R13B  | 0.47696  | down | -1.3227 |
| 132 | ARHGAP10  | 0.00198  | down | -1.7894 |
| 133 | RIPK1     | 0.40118  | down | -2.4836 |
| 134 | TICAM1    | 0.30464  | up   | 14.5132 |
| 135 | TLR3      | 0.37358  | up   | 10.1676 |
| 136 | BCL2L11   | 0.4009   | up   | 14.5325 |
| 137 | TJP2      | 0.37499  | down | -11.571 |
| 138 | FAS       | 0.89056  | down | -1.0923 |
| 139 | RIPK3     | 0.3078   | up   | 18.1291 |
| 140 | FADD      | 0.62923  | up   | 1.35857 |
| 141 | LMNA      | 0.32631  | up   | 14.6425 |
| 142 | TNFSF10   | 0.56597  | down | -1.2228 |
| 143 | APAF1     | 0.48626  | up   | 1.25049 |
| 144 | PSMD5     | 0.19088  | down | -2.2053 |
| 145 | BIRC3     | 0.9337   | down | -1.0856 |
| 146 | PSMF1     | 0.32187  | up   | 1.31185 |
| 147 | APC       | 0.62561  | down | -1.1818 |
| 148 | DNM1L     | 0.29106  | down | -1.7016 |
| 149 | AKT3      | 0.48109  | down | -1.3519 |
| 150 | BCL2L1    | 0.43407  | down | -10.823 |
| 151 | PPP3CC    | 0.44018  | down | -10.288 |
| 152 | BAK1      | 0.11794  | down | -1.7279 |
| 153 | DAPK1     | 0.10725  | up   | 2.41407 |
| 154 | DFFA      | 0.68044  | down | -1.1944 |
| 155 | TRAF2     | 0.35633  | down | -1.3088 |
| 156 | KPNA1     | 0.86286  | up   | 1.07722 |
| 157 | OCLN      | 0.9638   | up   | 1.04321 |
| 158 | PLEC      | 0.12833  | up   | 4.4146  |
| 159 | E2F1      | 0.01591  | down | -1.8188 |
| 160 | AKT2      | 0.63871  | down | -1.2328 |
| 161 | MAPK8     | 0.79763  | down | -1.1004 |
| 162 | TNFRSF10B | 0.56555  | up   | 1.81491 |
| 163 | BCL2      | 0.70118  | up   | 1.4075  |
| 164 | PRKCQ     | 0.07653  | up   | 1.46034 |
| 165 | PSMD12    | 0.76631  | up   | 1.29394 |
| 166 | BID       | 0.1994   | up   | 1.12442 |
| 167 | CFLAR     | 0.23041  | up   | 26.4385 |
| 168 | PSME4     | 0.38025  | down | -1.1343 |
| 169 | PSMB2     | 0.01436  | down | -1.6955 |
| 170 | BIRC2     | 0.41707  | up   | 1.32096 |
| 171 | MLKL      | 0.38089  | down | -20.461 |
| 172 | DIABLO    | 0.44222  | up   | 16.2425 |
| 173 | PSMA8     | 0.31197  | up   | 22.5945 |
| 174 | XIAP      | 0.10283  | up   | 1.61093 |
| 175 | TFDP2     | 0.04368  | down | -2.4041 |
| 176 | CASP7     | 0.33028  | up   | 26.6412 |
| 177 | DSG2      | 0.66176  | down | -1.1508 |
| 178 | HIST1H1C  | 0.37358  | up   | 23.0742 |
| 179 | APPL1     | 0.84681  | down | -1.0112 |
| 180 | PSMA5     | 0.29868  | down | -1.2138 |
| 181 | PAK2      | 0.30117  | down | -1.2952 |
| 182 | OPA1      | 0.23671  | up   | 1.65632 |
| 183 | TP53BP2   | 0.99204  | up   | 1.01223 |
| 184 | STK26     | 0.84973  | up   | 1.13228 |
| 185 | CLSPN     | 0.61654  | down | -1.1331 |
| 186 | STK24     | 0.35418  | down | -1.2178 |
| 187 | PSMD1     | 0.23009  | down | -1.4371 |
| 188 | CYCS      | 0.08556  | down | -2.557  |
| 189 | PPP3R1    | 0.74455  | down | -1.177  |
| 190 | TFDP1     | 0.12466  | down | -2.1248 |
| 191 | SATB1     | 0.04668  | down | -1.9201 |
| 192 | YWHAG     | 0.28338  | down | -1.6428 |
| 193 | PMAIP1    | 0.13778  | up   | 1.31125 |
| 194 | PSMC2     | 0.21965  | up   | 1.2805  |
| 195 | CASP6     | 0.68342  | down | -1.0687 |
| 196 | PSMA3     | 0.34038  | down | -1.8195 |
| 197 | OMA1      | 0.71921  | up   | 1.45093 |
| 198 | PSMD11    | 0.81248  | down | -1.0722 |
| 199 | MAGED1    | 0.23664  | down | -1.3282 |

|           |        |          |      |         |
|-----------|--------|----------|------|---------|
| 200       | PSMB9  | 3.42E-04 | up   | 3.32865 |
| 201       | PSMB5  | 0.33331  | down | -1.8761 |
| 202       | GSN    | 0.01065  | up   | 6.05886 |
| 203       | PSME3  | 0.55071  | down | -1.3487 |
| 204       | PSME1  | 0.83179  | up   | 1.1909  |
| 205       | NMT1   | 0.27353  | up   | 1.73024 |
| 206       | YWHAH  | 0.13498  | down | -1.8072 |
| 207       | DBNL   | 0.57685  | up   | 1.09583 |
| 208       | PSMC4  | 0.71156  | down | -1.1718 |
| 209       | ADD1   | 0.00204  | up   | 1.7519  |
| 210       | PSMC6  | 0.54975  | up   | 1.20034 |
| 211       | AKT1   | 0.13049  | down | -1.3801 |
| 212       | PSMD7  | 0.72164  | up   | 1.03231 |
| 213       | ROCK1  | 0.14633  | up   | 1.11912 |
| 214       | CASP3  | 0.32313  | down | -1.2895 |
| 215       | PSMA2  | 0.71828  | down | -1.1299 |
| 216       | FNTA   | 0.54916  | down | -10.037 |
| 217       | PSMD2  | 0.16635  | down | -1.5651 |
| 218       | PSMD3  | 0.39265  | down | -2.3255 |
| 219       | ACIN1  | 0.24077  | down | -2.072  |
| 220       | PSMD13 | 0.42861  | down | -1.7164 |
| 221       | PSMB1  | 0.24434  | down | -1.5155 |
| 222       | PSMC1  | 0.36562  | down | -1.3956 |
| 223       | PSMA1  | 0.8486   | down | -1.0649 |
| 224       | PSMB7  | 0.0752   | down | -1.7797 |
| 225       | PSMD14 | 0.87231  | up   | 1.05948 |
| 226       | CTNNB1 | 0.16543  | up   | 1.81613 |
| 227       | CASP8  | 0.55977  | up   | 1.72412 |
| 228       | SPTAN1 | 0.30384  | up   | 1.71536 |
| 229       | PSMC3  | 0.12212  | down | -2.1907 |
| 230       | PSMB8  | 0.9535   | down | -1.0191 |
| 231       | H1FO   | 0.19967  | up   | 2.73541 |
| 232       | PSMB6  | 0.49524  | down | -1.248  |
| 233       | PSMD10 | 0.17213  | up   | 2.132   |
| 234       | PSMD8  | 0.38639  | up   | 1.52298 |
| 235       | BCAP31 | 0.75058  | up   | 1.26663 |
| 236       | UBC    | 0.31332  | down | -1.3998 |
| 237       | PSMD4  | 0.24035  | up   | 1.435   |
| 238       | PSMA4  | 0.5224   | down | -1.1716 |
| 239       | KPNB1  | 2.58E-04 | down | -1.3388 |
| 240       | YWHAB  | 0.88491  | down | -1.0361 |
| 241       | PSMD6  | 0.13297  | up   | 1.38161 |
| 242       | TP53   | 0.04771  | up   | 1.80401 |
| 243       | PSMC5  | 0.72451  | down | -1.1241 |
| 244       | PSMB4  | 0.28064  | down | -1.5367 |
| 245       | LMNB1  | 0.37105  | up   | 1.18916 |
| 246       | PSMA7  | 0.2934   | down | -1.3646 |
| 247       | YWHAQ  | 0.15238  | down | -1.2362 |
| 248       | PSMA6  | 0.21145  | down | -1.4608 |
| 249       | YWHAE  | 0.16999  | down | -1.4784 |
| 250       | PSME2  | 0.04133  | up   | 3.2275  |
| 251       | DYNLL1 | 0.80404  | down | -1.0631 |
| 252       | HMGB1  | 0.97706  | up   | 1.00216 |
| 253       | YWHAZ  | 0.23433  | up   | 1.31521 |
| 254       | UBA52  | 0.44288  | up   | 1.06547 |
| 255       | HMGB2  | 0.00499  | up   | 1.90299 |
| 256       | RPS27A | 0.77323  | down | -1.0158 |
| 257       | VIM    | 0.00222  | up   | 2.68547 |
| 258       | UBB    | 0.0568   | up   | 1.31385 |
| Chemokine |        |          |      |         |
| 259       | ADCY1  | 1        | down | -1      |
| 260       | ADCY2  | 1        | down | -1      |
| 261       | ADCY3  | 0.92067  | up   | 1.0868  |
| 262       | ADCY4  | 0.37358  | up   | 8.49834 |
| 263       | ADCY5  | 1        | down | -1      |
| 264       | ADCY6  | 0.37358  | down | -6.2535 |
| 265       | ADCY7  | 0.30675  | up   | 14.649  |
| 266       | ADCY8  | 1        | down | -1      |
| 267       | ADCY9  | 0.37358  | down | -8.2008 |
| 268       | AKT1   | 0.13049  | down | -1.3801 |
| 269       | AKT2   | 0.63871  | down | -1.2328 |
| 270       | AKT3   | 0.48109  | down | -1.3519 |
| 271       | ARRB1  | 0.88238  | down | -1.0982 |

|     |        |         |      |         |
|-----|--------|---------|------|---------|
| 272 | ARRB2  | 0.1414  | down | -1.9308 |
| 273 | BCAR1  | 1       | down | -1      |
| 274 | BRAF   | 0.27861 | up   | 2.3275  |
| 275 | CCL1   | 1       | down | -1      |
| 276 | CCL11  | 1       | down | -1      |
| 277 | CCL13  | 1       | down | -1      |
| 278 | CCL17  | 1       | down | -1      |
| 279 | CCL19  | 1       | down | -1      |
| 280 | CCL2   | 1       | down | -1      |
| 281 | CCL20  | 1       | down | -1      |
| 282 | CCL21  | 1       | down | -1      |
| 283 | CCL22  | 1       | down | -1      |
| 284 | CCL24  | 1       | down | -1      |
| 285 | CCL25  | 1       | down | -1      |
| 286 | CCL26  | 1       | down | -1      |
| 287 | CCL27  | 1       | down | -1      |
| 288 | CCL28  | 1       | down | -1      |
| 289 | CCL7   | 1       | down | -1      |
| 290 | CCL8   | 1       | down | -1      |
| 291 | CCR1   | 0.37358 | down | -9.7138 |
| 292 | CCR10  | 1       | down | -1      |
| 293 | CCR2   | 1       | down | -1      |
| 294 | CCR3   | 1       | down | -1      |
| 295 | CCR4   | 0.93721 | up   | 1.44873 |
| 296 | CCR5   | 1       | down | -1      |
| 297 | CCR6   | 1       | down | -1      |
| 298 | CCR7   | 0.98299 | up   | 1.07677 |
| 299 | CCR8   | 1       | down | -1      |
| 300 | CCR9   | 1       | down | -1      |
| 301 | CDC42  | 0.75086 | up   | 1.1594  |
| 302 | CHUK   | 0.50412 | down | -1.2536 |
| 303 | CRK    | 0.88691 | down | -1.0691 |
| 304 | CRKL   | 0.8074  | down | -1.0713 |
| 305 | CX3CL1 | 1       | down | -1      |
| 306 | CX3CR1 | 0.37358 | up   | 9.5964  |
| 307 | CXCL1  | 1       | down | -1      |
| 308 | CXCL10 | 1       | down | -1      |
| 309 | CXCL11 | 1       | down | -1      |
| 310 | CXCL12 | 1       | down | -1      |
| 311 | CXCL13 | 1       | down | -1      |
| 312 | CXCL16 | 0.93352 | up   | 1.34627 |
| 313 | CXCL2  | 1       | down | -1      |
| 314 | CXCL3  | 0.37358 | up   | 16.984  |
| 315 | CXCL5  | 1       | down | -1      |
| 316 | CXCL6  | 1       | down | -1      |
| 317 | CXCL8  | 1       | down | -1      |
| 318 | CXCL9  | 1       | down | -1      |
| 319 | CXCR1  | 1       | down | -1      |
| 320 | CXCR2  | 1       | down | -1      |
| 321 | CXCR3  | 1       | down | -1      |
| 322 | CXCR4  | 0.52572 | down | -1.1104 |
| 323 | CXCR5  | 1       | down | -1      |
| 324 | CXCR6  | 1       | down | -1      |
| 325 | DOCK2  | 0.03907 | up   | 1.67829 |
| 326 | ELMO1  | 0.29805 | up   | 1.33253 |
| 327 | FGR    | 1       | down | -1      |
| 328 | FOXO3  | 0.16927 | up   | 2.23194 |
| 329 | GNAI1  | 1       | down | -1      |
| 330 | GNAI2  | 0.55328 | up   | 1.06171 |
| 331 | GNAI3  | 0.36895 | up   | 1.65423 |
| 332 | GNB1   | 0.20052 | up   | 1.18781 |
| 333 | GNB2   | 0.61343 | down | -1.1052 |
| 334 | GNB3   | 0.37358 | down | -11.986 |
| 335 | GNB4   | 0.53829 | down | -1.2765 |
| 336 | GNB5   | 0.75745 | down | -1.08   |
| 337 | GNG10  | 0.01155 | up   | 4.33496 |
| 338 | GNG11  | 1       | down | -1      |
| 339 | GNG12  | 1       | down | -1      |
| 340 | GNG13  | 1       | down | -1      |
| 341 | GNG2   | 0.11172 | up   | 2.44759 |
| 342 | GNG3   | 1       | down | -1      |
| 343 | GNG4   | 1       | down | -1      |
| 344 | GNG5   | 0.31003 | down | -1.2821 |



|     |         |          |      |         |
|-----|---------|----------|------|---------|
| 345 | GNG7    | 1        | down | -1      |
| 346 | GNG8    | 1        | down | -1      |
| 347 | GNGT1   | 1        | down | -1      |
| 348 | GNGT2   | 0.37358  | down | -25.649 |
| 349 | GRB2    | 0.32918  | down | -1.2258 |
| 350 | GRK1    | 1        | down | -1      |
| 351 | GRK2    | 0.83571  | up   | 1.04019 |
| 352 | GRK3    | 0.39898  | up   | 1.85103 |
| 353 | GRK4    | 1        | down | -1      |
| 354 | GRK5    | 0.47382  | up   | 7.85783 |
| 355 | GRK6    | 0.98655  | down | -1.0135 |
| 356 | GRK7    | 0.37358  | down | -12.04  |
| 357 | GSK3A   | 0.70985  | up   | 1.17434 |
| 358 | GSK3B   | 0.3232   | down | -1.3657 |
| 359 | HCK     | 1        | down | -1      |
| 360 | HRAS    | 0.03552  | down | -2.2043 |
| 361 | IKBKB   | 0.03252  | up   | 2.08251 |
| 362 | ITK     | 1.15E-05 | up   | 134.452 |
| 363 | JAK2    | 0.81695  | down | -1.1811 |
| 364 | JAK3    | 0.16216  | up   | 2.53706 |
| 365 | KRAS    | 0.55227  | up   | 1.37549 |
| 366 | LYN     | 1        | down | -1      |
| 367 | MAP2K1  | 0.01787  | up   | 4.05492 |
| 368 | MAPK1   | 0.29871  | up   | 1.36281 |
| 369 | MAPK3   | 0.27823  | up   | 1.5037  |
| 370 | NCF1    | 1        | down | -1      |
| 371 | NFKB1   | 0.03529  | up   | 1.88117 |
| 372 | NFKBIA  | 0.41133  | up   | 14.5421 |
| 373 | NFKBIB  | 0.60382  | down | -1.2591 |
| 374 | NRAS    | 0.35136  | up   | 1.25179 |
| 375 | PAK1    | 0.10659  | down | -1.7687 |
| 376 | PARD3   | 0.37993  | up   | 14.4392 |
| 377 | PF4     | 1        | down | -1      |
| 378 | PF4V1   | 1        | down | -1      |
| 379 | PIK3CA  | 0.87587  | down | -1.0686 |
| 380 | PIK3CB  | 0.65523  | up   | 1.37366 |
| 381 | PIK3CD  | 0.40677  | up   | 1.9174  |
| 382 | PIK3R1  | 0.16861  | up   | 1.72703 |
| 383 | PIK3R2  | 0.12718  | up   | 2.14107 |
| 384 | PIK3R3  | 0.38517  | up   | 1.37425 |
| 385 | PLCB1   | 0.58731  | down | -4.5302 |
| 386 | PLCB2   | 0.01148  | up   | 2.49103 |
| 387 | PLCB3   | 0.97927  | down | -1.0951 |
| 388 | PLCB4   | 1        | down | -1      |
| 389 | PPBP    | 1        | down | -1      |
| 390 | PREX1   | 0.07017  | up   | 1.76681 |
| 391 | PRKACA  | 0.13591  | down | -1.6367 |
| 392 | PRKACB  | 0.28286  | up   | 1.34527 |
| 393 | PRKACG  | 1        | down | -1      |
| 394 | PRKCB   | 0.35731  | up   | 1.48241 |
| 395 | PRKCD   | 0.37358  | down | -10.09  |
| 396 | PRKCZ   | 0.37358  | down | -11.989 |
| 397 | PTK2    | 1        | down | -1      |
| 398 | PTK2B   | 0.29674  | up   | 3.11915 |
| 399 | PXN     | 2.18E-04 | up   | 147.585 |
| 400 | RAC1    | 0.09708  | down | -1.5667 |
| 401 | RAC2    | 0.45206  | up   | 1.41186 |
| 402 | RAF1    | 0.06508  | down | -2.8229 |
| 403 | RAP1A   | 0.19801  | up   | 1.21835 |
| 404 | RAP1B   | 0.15289  | down | -1.1922 |
| 405 | RASGRP2 | 0.01276  | down | -2.757  |
| 406 | RELA    | 0.49335  | down | -1.4668 |
| 407 | RHOA    | 0.62937  | down | -1.0811 |
| 408 | ROCK1   | 0.14633  | up   | 1.11912 |
| 409 | ROCK2   | 0.70567  | up   | 1.0678  |
| 410 | SHC1    | 0.71552  | up   | 1.35322 |
| 411 | SHC2    | 1        | down | -1      |
| 412 | SHC3    | 1        | down | -1      |
| 413 | SHC4    | 1        | down | -1      |
| 414 | SOS1    | 0.74186  | down | -1.2853 |
| 415 | SOS2    | 0.27102  | up   | 2.40797 |
| 416 | SRC     | 0.53361  | down | -1.2698 |
| 417 | STAT1   | 0.38021  | up   | 1.44865 |

|            |        |          |      |          |
|------------|--------|----------|------|----------|
| 418        | STAT2  | 0.42189  | up   | 1.46378  |
| 419        | STAT3  | 0.12597  | up   | 2.33681  |
| 420        | STAT5B | 0.96855  | up   | 1.00879  |
| 421        | TIAM1  | 0.52048  | up   | 1.39615  |
| 422        | VAV1   | 0.73544  | down | -1.2173  |
| 423        | VAV2   | 0.37358  | up   | 10.6416  |
| 424        | VAV3   | 0.0813   | up   | 2.74922  |
| 425        | WAS    | 0.75225  | up   | 1.11257  |
| 426        | WASL   | 0.35306  | up   | 8.84513  |
| 427        | XCR1   | 1        | down | -1       |
| Interferon |        |          |      |          |
| 428        | ADAR   | 0.886521 | down | -1.04059 |
| 429        | BST2   | 0.638579 | down | -1.54325 |
| 430        | EGR1   | 0.373579 | up   | 9.043283 |
| 431        | GBP2   | 0.373579 | up   | 8.473002 |
| 432        | HLA-A  | 0.014832 | up   | 1.680696 |
| 433        | HLA-B  | 0.096691 | up   | 1.761654 |
| 434        | HLA-C  | 0.097173 | up   | 1.299062 |
| 435        | HLA-E  | 0.103501 | up   | 6.642726 |
| 436        | HLA-F  | 1        | down | -1       |
| 437        | HLA-G  | 0.373579 | up   | 19.87244 |
| 438        | HLA-H  | 1        | down | -1       |
| 439        | IFI27  | 1        | down | -1       |
| 440        | IFI35  | 1        | down | -1       |
| 441        | IFI6   | 0.373579 | up   | 19.75292 |
| 442        | IFIT1  | 0.932282 | down | -1.31671 |
| 443        | IFIT2  | 1        | down | -1       |
| 444        | IFIT3  | 1        | down | -1       |
| 445        | IFITM1 | 0.528722 | up   | 1.254626 |
| 446        | IFITM2 | 0.680513 | down | -1.36165 |
| 447        | IFITM3 | 1        | down | -1       |
| 448        | IFNA1  | 1        | down | -1       |
| 449        | IFNA10 | 1        | down | -1       |
| 450        | IFNA13 | 1        | down | -1       |
| 451        | IFNA14 | 1        | down | -1       |
| 452        | IFNA16 | 1        | down | -1       |
| 453        | IFNA17 | 1        | down | -1       |
| 454        | IFNA2  | 1        | down | -1       |
| 455        | IFNA21 | 1        | down | -1       |
| 456        | IFNA4  | 1        | down | -1       |
| 457        | IFNA5  | 1        | down | -1       |
| 458        | IFNA6  | 1        | down | -1       |
| 459        | IFNA7  | 1        | down | -1       |
| 460        | IFNA8  | 1        | down | -1       |
| 461        | IFNAR1 | 0.604738 | up   | 1.427341 |
| 462        | IFNAR2 | 0.639698 | up   | 1.276351 |
| 463        | IFNB1  | 1        | down | -1       |
| 464        | IP6K2  | 0.074849 | up   | 2.206121 |
| 465        | IRF1   | 0.385881 | up   | 15.60537 |
| 466        | IRF2   | 0.275745 | up   | 1.926423 |
| 467        | IRF3   | 0.340062 | up   | 27.52587 |
| 468        | IRF4   | 1        | down | -1       |
| 469        | IRF5   | 1        | down | -1       |
| 470        | IRF6   | 1        | down | -1       |
| 471        | IRF7   | 0.205625 | up   | 48.22053 |
| 472        | IRF8   | 1        | down | -1       |
| 473        | IRF9   | 0.373579 | down | -17.3882 |
| 474        | ISG15  | 0.736064 | up   | 1.159735 |
| 475        | ISG20  | 1        | down | -1       |
| 476        | JAK1   | 0.412642 | up   | 2.032627 |
| 477        | MX1    | 0.373579 | down | -11.2784 |
| 478        | MX2    | 0.904395 | up   | 1.57494  |
| 479        | OAS1   | 0.373579 | up   | 26.93757 |
| 480        | OAS2   | 0.497302 | down | -1.80768 |
| 481        | OAS3   | 0.928764 | up   | 1.042124 |
| 482        | OASL   | 1        | down | -1       |
| 483        | PSMB8  | 0.953498 | down | -1.01913 |
| 484        | PTPN1  | 0.421216 | up   | 2.896049 |
| 485        | PTPN11 | 0.700305 | up   | 1.02794  |
| 486        | PTPN6  | 0.466161 | up   | 1.838392 |

|             |          |          |      |          |
|-------------|----------|----------|------|----------|
| 487         | RNASEL   | 0.482366 | down | -1.21913 |
| 488         | RSAD2    | 0.373579 | down | -8.84184 |
| 489         | SAMHD1   | 1        | down | -1       |
| 490         | SOC51    | 1        | down | -1       |
| 491         | SOC53    | 0.373579 | up   | 9.598569 |
| 492         | STAT1    | 0.380206 | up   | 1.448652 |
| 493         | STAT2    | 0.421894 | up   | 1.463777 |
| 494         | TYK2     | 0.190994 | down | -1.89623 |
| 495         | USP18    | 0.469187 | up   | 1.571843 |
| 496         | XAF1     | 1        | down | -1       |
| <b>NFκB</b> |          |          |      |          |
| 497         | ABHD8    | 1        | down | -1       |
| 498         | ACTN1    | 0.68631  | down | -1.1372  |
| 499         | ACTN3    | 1        | down | -1       |
| 500         | ADGRB2   | 0.84726  | up   | 1.88967  |
| 501         | AGPAT1   | 0.60671  | down | -1.455   |
| 502         | ALG6     | 0.35601  | up   | 14.8678  |
| 503         | AP1S2    | 0.62617  | up   | 1.82384  |
| 504         | ARHGAP44 | 1        | down | -1       |
| 505         | ARHGAP5  | 0.09871  | up   | 1.20635  |
| 506         | ARHGAP8  | 1        | down | -1       |
| 507         | ARPC2    | 0.82457  | down | -1.0802  |
| 508         | ASCL3    | 1        | down | -1       |
| 509         | ASH1L    | 0.06049  | down | -2.8156  |
| 510         | ATOH1    | 1        | down | -1       |
| 511         | ATP1B1   | 0.98293  | up   | 1.07859  |
| 512         | BCKDK    | 0.66906  | up   | 1.1586   |
| 513         | BCL3     | 0.91929  | up   | 1.46704  |
| 514         | BCL6B    | 0.37358  | up   | 8.81102  |
| 515         | BDNF     | 0.37358  | down | -8.3694  |
| 516         | BFSP1    | 1        | down | -1       |
| 517         | BIRC3    | 0.9337   | down | -1.0856  |
| 518         | BMF      | 1        | down | -1       |
| 519         | BMP2K    | 0.24495  | up   | 1.29685  |
| 520         | BNC2     | 1        | down | -1       |
| 521         | C1QL1    | 1        | down | -1       |
| 522         | CD83     | 0.93904  | down | -1.0643  |
| 523         | CDC14A   | 0.91138  | down | -1.4913  |
| 524         | CDK6     | 0.9421   | down | -1.012   |
| 525         | CFAP69   | 1        | down | -1       |
| 526         | CHD4     | 0.32021  | up   | 1.20287  |
| 527         | CHD6     | 0.21416  | up   | 1.78502  |
| 528         | CLCN1    | 1        | down | -1       |
| 529         | COL11A2  | 0.88758  | up   | 1.51958  |
| 530         | COL16A1  | 1        | down | -1       |
| 531         | CPD      | 0.50348  | up   | 1.28595  |
| 532         | CREB1    | 0.38513  | up   | 1.71716  |
| 533         | CTAGE4   | 1        | down | -1       |
| 534         | CTGF     | 1        | down | -1       |
| 535         | CXCL10   | 1        | down | -1       |
| 536         | CXCL11   | 1        | down | -1       |
| 537         | CXCL16   | 0.93352  | up   | 1.34627  |
| 538         | CXCL2    | 1        | down | -1       |
| 539         | CXCL5    | 1        | down | -1       |
| 540         | CXCL6    | 1        | down | -1       |
| 541         | CXCL9    | 1        | down | -1       |
| 542         | CXCR5    | 1        | down | -1       |
| 543         | CYLD     | 0.66275  | down | -1.3515  |
| 544         | DAP3     | 0.10424  | down | -2.3797  |
| 545         | DCLK1    | 1        | down | -1       |
| 546         | DDR1     | 0.99666  | up   | 1.0031   |
| 547         | EBI3     | 1        | down | -1       |
| 548         | EDN2     | 1        | down | -1       |
| 549         | EGF      | 1        | down | -1       |
| 550         | EHF      | 1        | down | -1       |
| 551         | EIF5A    | 0.0308   | down | -2.8691  |
| 552         | ENO3     | 0.37358  | up   | 12.326   |
| 553         | ERN1     | 0.41865  | up   | 1.56566  |
| 554         | ETV6     | 0.09165  | up   | 1.71061  |
| 555         | FBXL12   | 0.28571  | up   | 1.56443  |
| 556         | FGF1     | 1        | down | -1       |
| 557         | FGF17    | 1        | down | -1       |
| 558         | FLRT1    | 1        | down | -1       |

|     |           |          |      |         |
|-----|-----------|----------|------|---------|
| 559 | FOXJ2     | 0.70552  | down | -1.1583 |
| 560 | FOXS1     | 1        | down | -1      |
| 561 | FTHL17    | 1        | down | -1      |
| 562 | FUT7      | 0.98263  | up   | 1.07522 |
| 563 | GABRB1    | 1        | down | -1      |
| 564 | GADD45B   | 0.35651  | up   | 15.4135 |
| 565 | GATA4     | 1        | down | -1      |
| 566 | GEN1      | 0.65117  | up   | 1.29679 |
| 567 | GNAO1     | 0.37358  | down | -5.9641 |
| 568 | GNB1      | 0.20052  | up   | 1.18781 |
| 569 | GNG4      | 1        | down | -1      |
| 570 | GPHN      | 0.16979  | up   | 2.38881 |
| 571 | GREM1     | 1        | down | -1      |
| 572 | GRIN2D    | 1        | down | -1      |
| 573 | GRK5      | 0.47382  | up   | 7.85783 |
| 574 | HCFC1     | 0.29852  | up   | 1.31879 |
| 575 | HCST      | 0.99556  | up   | 1.0275  |
| 576 | HIVEP1    | 0.08069  | up   | 1.71572 |
| 577 | HOXA11    | 0.92972  | down | -1.3656 |
| 578 | HOXB9     | 1        | down | -1      |
| 579 | HSD11B2   | 1        | down | -1      |
| 580 | HSD3B7    | 1        | down | -1      |
| 581 | ICAM1     | 0.37358  | up   | 8.77461 |
| 582 | IER5      | 0.73809  | down | -1.1812 |
| 583 | IFNB1     | 1        | down | -1      |
| 584 | IGDCC3    | 1        | down | -1      |
| 585 | IL13      | 1        | down | -1      |
| 586 | IL1A      | 1        | down | -1      |
| 587 | IL1RAPL1  | 1        | down | -1      |
| 588 | IL1RN     | 1        | down | -1      |
| 589 | IL23A     | 2.04E-07 | down | -276.95 |
| 590 | IL27      | 1        | down | -1      |
| 591 | IL27RA    | 0.30762  | up   | 27.1906 |
| 592 | IL2RA     | 1        | down | -1      |
| 593 | IL4I1     | 1        | down | -1      |
| 594 | INO80D    | 0.66617  | up   | 1.35449 |
| 595 | IRF1      | 0.38588  | up   | 15.6054 |
| 596 | ITGB4     | 1        | down | -1      |
| 597 | JAK3      | 0.16216  | up   | 2.53706 |
| 598 | JARID2    | 0.50047  | up   | 1.17656 |
| 599 | KANSL1L   | 0.37358  | down | -13.248 |
| 600 | KCNH3     | 0.37358  | down | -8.1217 |
| 601 | KCNN3     | 1        | down | -1      |
| 602 | KCNS3     | 1        | down | -1      |
| 603 | KLK9      | 1        | down | -1      |
| 604 | KRTAP13-1 | 1        | down | -1      |
| 605 | LAMA1     | 1        | down | -1      |
| 606 | LIG1      | 0.04207  | up   | 2.20869 |
| 607 | LRCH1     | 0.579    | up   | 1.60042 |
| 608 | LTA       | 1        | down | -1      |
| 609 | LTB       | 1        | down | -1      |
| 610 | MADCAM1   | 1        | down | -1      |
| 611 | MAML2     | 1        | down | -1      |
| 612 | MAP3K8    | 0.37358  | down | -6.6771 |
| 613 | MAP4K2    | 0.01066  | down | -2.4515 |
| 614 | MED1      | 0.63561  | up   | 1.19448 |
| 615 | MMP9      | 1        | down | -1      |
| 616 | MOB3C     | 7.34E-07 | down | -84.746 |
| 617 | MSC       | 1        | down | -1      |
| 618 | MSN       | 0.04512  | up   | 1.96984 |
| 619 | MSX1      | 1        | down | -1      |
| 620 | NFAT5     | 0.0983   | down | -1.6318 |
| 621 | NFKB2     | 1.18E-04 | down | -253.27 |
| 622 | NFKBIB    | 0.60382  | down | -1.2591 |
| 623 | NFKBID    | 0.00159  | down | -175.53 |
| 624 | NLK       | 0.27105  | up   | 17.2459 |
| 625 | NOL4      | 1        | down | -1      |
| 626 | NR2F2     | 1        | down | -1      |
| 627 | NTN1      | 1        | down | -1      |
| 628 | OPCML     | 1        | down | -1      |
| 629 | P2RY10    | 1        | down | -1      |
| 630 | PAN2      | 0.05787  | up   | 2.28619 |
| 631 | PCBP4     | 0.41539  | up   | 1.90928 |

|     |          |          |      |         |
|-----|----------|----------|------|---------|
| 632 | PCSK2    | 1        | down | -1      |
| 633 | PFN1     | 0.65884  | down | -1.0696 |
| 634 | PLAU     | 1        | down | -1      |
| 635 | PRDM12   | 1        | down | -1      |
| 636 | PRX      | 0.37358  | down | -7.0651 |
| 637 | PTMS     | 0.69111  | down | -1.3869 |
| 638 | RALGDS   | 0.90585  | down | -1.0967 |
| 639 | RAP2C    | 0.14359  | down | -1.2295 |
| 640 | RBMS1    | 0.13269  | up   | 1.70083 |
| 641 | RELB     | 0.94154  | down | -1.3132 |
| 642 | RIMS2    | 0.98946  | up   | 1.03369 |
| 643 | RIN2     | 1        | down | -1      |
| 644 | RND1     | 0.00194  | up   | 241.729 |
| 645 | RPS6KA4  | 0.4893   | up   | 1.17319 |
| 646 | RRAS     | 1        | down | -1      |
| 647 | SALL1    | 1        | down | -1      |
| 648 | SAMSN1   | 0.15407  | down | -2.1742 |
| 649 | SDC4     | 1        | down | -1      |
| 650 | SEC14L2  | 0.48338  | down | -7.0382 |
| 651 | SESN2    | 0.32328  | up   | 16.2986 |
| 652 | SHOX2    | 0.37358  | up   | 10.0979 |
| 653 | SIN3A    | 0.46729  | up   | 1.34898 |
| 654 | SLAMF8   | 0.37358  | up   | 17.4482 |
| 655 | SLC11A2  | 0.16926  | down | -1.9723 |
| 656 | SLC12A2  | 0.83201  | up   | 1.27654 |
| 657 | SLC6A12  | 1        | down | -1      |
| 658 | SMOC1    | 1        | down | -1      |
| 659 | SMPD3    | 0.39987  | up   | 2.01754 |
| 660 | SOBP     | 0.99171  | up   | 1.02976 |
| 661 | SOX10    | 1        | down | -1      |
| 662 | SOX5     | 1        | down | -1      |
| 663 | SP6      | 1        | down | -1      |
| 664 | SPTB     | 1        | down | -1      |
| 665 | STAT6    | 0.69937  | down | -1.2906 |
| 666 | STC2     | 1        | down | -1      |
| 667 | SUN2     | 0.37071  | up   | 1.6998  |
| 668 | TAL1     | 0.85741  | up   | 1.06796 |
| 669 | TAZ      | 0.90592  | down | -1.1136 |
| 670 | TCEA2    | 0.37358  | up   | 13.4054 |
| 671 | TLX1     | 1        | down | -1      |
| 672 | TNF      | 1.10E-05 | up   | 170.291 |
| 673 | TNFRSF1B | 0.10108  | down | -2.5365 |
| 674 | TNFRSF9  | 1        | down | -1      |
| 675 | TNFSF15  | 1        | down | -1      |
| 676 | TNFSF18  | 1        | down | -1      |
| 677 | TNIP1    | 0.27302  | down | -1.4924 |
| 678 | TP53     | 0.04771  | up   | 1.80401 |
| 679 | TP63     | 1        | down | -1      |
| 680 | TRAF4    | 0.69005  | up   | 1.35819 |
| 681 | TRIB2    | 0.91094  | down | -1.0969 |
| 682 | TRIM47   | 0.37358  | down | -21.308 |
| 683 | TSLP     | 0.92669  | up   | 1.52376 |
| 684 | TUBGCP4  | 0.43011  | down | -13.158 |
| 685 | UACA     | 1        | down | -1      |
| 686 | UBD      | 1        | down | -1      |
| 687 | UBE2D3   | 0.47358  | down | -1.1466 |
| 688 | UBE2H    | 0.25753  | up   | 1.78271 |
| 689 | UBE2I    | 0.35498  | up   | 1.33321 |
| 690 | UBE4B    | 0.30625  | down | -1.4813 |
| 691 | VCAM1    | 1        | down | -1      |
| 692 | VSX2     | 1        | down | -1      |
| 693 | WNT10A   | 1        | down | -1      |
| 694 | WNT10B   | 1        | down | -1      |
| 695 | ZBTB11   | 0.6547   | up   | 1.30638 |
| 696 | ZBTB5    | 0.37505  | up   | 11.3093 |
| 697 | ZBTB9    | 0.28811  | up   | 18.3014 |
| 698 | ZFP36L2  | 0.17509  | down | -1.3444 |
| 699 | ZMYND15  | 1        | down | -1      |
| 700 | ZNF232   | 0.95499  | down | -1.2557 |
| 701 | ZNF384   | 0.93961  | down | -1.047  |
| 702 | ZNF821   | 1        | down | -1      |
